# Supplementary material for: Safety and Tolerability of SRX246, a Vasopressin 1a Antagonist, in Irritable Huntington’s Disease Patients—A Randomized Phase 2 Clinical Trial
Source: PubMed Central journal article supplement (PMC7696926; doi:10.3390/jcm9113682), 2020-11-16

**Supplementary Table S1.** The schedule of visits and assessments conducted from screening to the end of study visit. In addition, participants and their study partners (caregivers) answered questions in an eDiary (electronic Patient Reported Outcome; ePRO) about mood and aggressive outbursts using a web application that was developed for this study.

| Week                                                                   | SC           | BL             | 2              | 4              | 6              | 8              | 10               | 12             | F/U      |
|------------------------------------------------------------------------|--------------|----------------|----------------|----------------|----------------|----------------|------------------|----------------|----------|
| Visit Window                                                           | Day -30 to 0 | Day 0          | Day 14±5       | Day 28±5       | Day 42±5       | Day 56±5       | Day 70±5         | Day 84±5       | Day 91±5 |
| Visit                                                                  | SC           | BL             | 01             | T1             | 02             | 03             | 04               | 05             | T2       |
| Assessment                                                             | Dosing (BID) |                | 120 mg         |                | 120 or 160mg   |                |                  |                | none     |
| Review Study Drug Compliance                                           |              |                | X              | X              | X              | X              | X                | X              |          |
| Assessments for Adverse Events                                         |              | X              | X              | X              | X              | X              | X                | X              | X        |
| Assessments for Concomitant Medication Use                             |              | X              | X              | X              | X              | X              | X                | X              | X        |
| Columbia Suicide Severity Rating Scale (CSSRS)                         | X            | X              | X              |                | X              | X              | X                | X              |          |
| Unified Huntington Disease Rating Scale (UHDRS)                        | X            | X              |                |                | X              |                |                  | X              |          |
| Clinical Global Impression-Severity of Illness (CGI-S)                 |              | X              |                |                |                |                |                  |                |          |
| Clinical Global Impression-Improvement (CGI-I)                         |              |                |                |                | X              |                |                  | X              |          |
| Provide Diary and Instructions                                         |              | X              | R              | R              | R              | R              | R                | R              |          |
| Aberrant Behavior Checklist (ABC), irritability subscale               |              | X              |                |                | X              |                |                  | X              |          |
| Cohen-Mansfield Aggression Inventory (CMAI)                            |              | X              |                |                | X              |                |                  | X              |          |
| Problem Behaviors Assessment-short form (PBA-s)                        |              | X              |                |                | X              |                |                  | X              |          |
| Irritability Scale                                                     |              | X              |                |                | X              |                |                  | X              |          |
| HD QoL                                                                 |              | X              |                |                | X              |                |                  | X              |          |
| Caregiver Burden Questionnaire                                         |              | X              |                |                | X              |                |                  | X              |          |
| Participant/Study Partner/PI Blindedness Questionnaire                 |              |                |                |                |                |                |                  | X              |          |
| Informed Consent (Subject)                                             | X            | R              |                |                |                |                |                  |                |          |
| Informed Consent (Study Partner)                                       | X            | R <sup>a</sup> | R <sup>e</sup> | R <sup>e</sup> | R <sup>e</sup> | R <sup>e</sup> | R <sup>e</sup>   | R <sup>e</sup> |          |
| Assign Subject ID/ Unique Site ID number                               | X            |                |                |                |                |                |                  |                |          |
| Inclusion/Exclusion Criteria                                           | X            | R              |                |                |                |                |                  |                |          |
| Screening Demographics (Subject)                                       | X            |                |                |                |                |                |                  |                |          |
| Screening Demographics (Study Partner)                                 | X            | R <sup>a</sup> | R <sup>e</sup> | R <sup>e</sup> | R <sup>e</sup> | R <sup>e</sup> | R <sup>e</sup>   | R <sup>e</sup> |          |
| Medical & Surgical History                                             | X            | R              |                |                |                |                |                  |                |          |
| Review methods of birth control with men and women                     | X            | X              |                |                |                |                |                  |                |          |
| Complete Physical Exam, including neurological                         | X            |                |                |                |                |                |                  | X              |          |
| Height, Weight (wt)                                                    | X            |                |                |                | X(wt)          |                |                  | X(wt)          |          |
| Orthostatic Vital Signs (HR, BP), and Body Temperature                 | X            | X <sup>b</sup> | X              |                | X              | X <sup>b</sup> | X                | X              |          |
| Resting 12-Lead EKG                                                    | X            | X              | X              |                | X              | X              | X                | X              |          |
| Safety Labs (Hematology, Chemistry, Urinalysis, Study Drug Spot Check) | X            | X <sup>h</sup> | X <sup>g</sup> |                | X <sup>g</sup> | X              | X                | X <sup>g</sup> |          |
| Pregnancy Test (females only)                                          | X(s)         | X(u)           |                |                | X(s)           |                |                  | X(s)           |          |
| Urine Drug Screen                                                      | X            |                |                |                |                |                |                  |                |          |
| Blood Collections for CAGn Genotyping and storage                      |              | X              | R <sup>f</sup> |                | R <sup>f</sup> | R <sup>f</sup> | R <sup>f</sup>   | R <sup>f</sup> |          |
| Randomization Assignment                                               |              | X              |                |                |                |                |                  |                |          |
| Dispense Study drug                                                    |              | X              | X              |                | X              | X              | X                |                |          |
| Instruct Subject and Study Partner about Study Drug                    |              | X              | X              |                | X              | X              | X                | X <sup>c</sup> |          |
| Administer Study Drug on Site                                          |              | X              |                |                |                | X              | (X) <sup>d</sup> |                |          |

**Supplementary Table S2. Adverse Events by System Organ Class and Treatment Group**

| Column 1                                           | 2                    | 3              | 4    | 5                    | 6              | 7    | 8                    | 9              | 10   | 11                  | 12                  | 13                  |
|----------------------------------------------------|----------------------|----------------|------|----------------------|----------------|------|----------------------|----------------|------|---------------------|---------------------|---------------------|
|                                                    | Group                |                |      |                      |                |      |                      |                |      |                     |                     |                     |
| System Organ Class                                 | 120 mg<br>N = 36     |                |      | Placebo<br>N = 36    |                |      | 160 mg<br>N = 34     |                |      | RR (95% CI)         |                     |                     |
|                                                    | # (%) of<br>Subjects | # of<br>Events | Rate | # (%) of<br>Subjects | # of<br>Events | Rate | # (%) of<br>Subjects | # of<br>Events | Rate | Placebo vs 120 mg   | Placebo vs 160 mg   | 120 mg vs 160 mg    |
| <b>Blood</b>                                       |                      |                |      |                      |                |      |                      |                |      |                     |                     |                     |
| Lymph node pain                                    | 1 (2.8%)             | 1              | .009 | 0 (0.0%)             | 0              | .000 | 0 (0.0%)             | 0              | .000 | N/A                 | N/A                 | N/A                 |
| <b>Cardiac</b>                                     |                      |                |      |                      |                |      |                      |                |      |                     |                     |                     |
| Angina pectoris                                    | 1 (2.8%)             | 1              | .009 | 0 (0.0%)             | 0              | .000 | 0 (0.0%)             | 0              | .000 | N/A                 | N/A                 | N/A                 |
| Atrioventricular block<br>first degree             | 0 (0.0%)             | 0              | .000 | 1 (2.8%)             | 1              | .009 | 0 (0.0%)             | 0              | .000 | N/A                 | N/A                 | N/A                 |
| Bundle branch block<br>left                        | 0 (0.0%)             | 0              | .000 | 1 (2.8%)             | 1              | .009 | 0 (0.0%)             | 0              | .000 | N/A                 | N/A                 | N/A                 |
| Palpitations                                       | 0 (0.0%)             | 0              | .000 | 0 (0.0%)             | 0              | .000 | 1 (2.9%)             | 1              | .009 | N/A                 | N/A                 | N/A                 |
| <b>Gastrointestinal</b>                            |                      |                |      |                      |                |      |                      |                |      |                     |                     |                     |
| Abdominal distension                               | 1 (2.8%)             | 1              | .009 | 0 (0.0%)             | 0              | .000 | 0 (0.0%)             | 0              | .000 | N/A                 | N/A                 | N/A                 |
| Abdominal pain                                     | 1 (2.8%)             | 1              | .009 | 0 (0.0%)             | 0              | .000 | 0 (0.0%)             | 0              | .000 | N/A                 | N/A                 | N/A                 |
| Abdominal pain lower                               | 0 (0.0%)             | 0              | .000 | 1 (2.8%)             | 1              | .009 | 0 (0.0%)             | 0              | .000 | N/A                 | N/A                 | N/A                 |
| Abdominal pain<br>upper                            | 1 (2.8%)             | 1              | .009 | 1 (2.8%)             | 1              | .009 | 3 (8.8%)             | 3              | .026 | 1.00 ( 0.07, 15.38) | 0.31 ( 0.03, 2.88)  | 0.31 ( 0.03, 2.88)  |
| Constipation                                       | 0 (0.0%)             | 0              | .000 | 1 (2.8%)             | 1              | .009 | 0 (0.0%)             | 0              | .000 | N/A                 | N/A                 | N/A                 |
| Diarrhoea                                          | 1 (2.8%)             | 1              | .009 | 0 (0.0%)             | 0              | .000 | 1 (2.9%)             | 1              | .009 | N/A                 | N/A                 | 0.94 ( 0.06, 14.51) |
| Dyspepsia                                          | 3 (8.3%)             | 3              | .027 | 0 (0.0%)             | 0              | .000 | 0 (0.0%)             | 0              | .000 | N/A                 | N/A                 | N/A                 |
| Gastroesophageal<br>reflux disease                 | 0 (0.0%)             | 0              | .000 | 0 (0.0%)             | 0              | .000 | 1 (2.9%)             | 1              | .009 | N/A                 | N/A                 | N/A                 |
| Nausea                                             | 3 (8.3%)             | 4              | .036 | 0 (0.0%)             | 0              | .000 | 5 (14.7%)            | 5              | .043 | N/A                 | N/A                 | 0.57 ( 0.15, 2.19)  |
| Tongue disorder                                    | 1 (2.8%)             | 1              | .009 | 0 (0.0%)             | 0              | .000 | 0 (0.0%)             | 0              | .000 | N/A                 | N/A                 | N/A                 |
| Toothache                                          | 0 (0.0%)             | 0              | .000 | 1 (2.8%)             | 1              | .009 | 0 (0.0%)             | 0              | .000 | N/A                 | N/A                 | N/A                 |
| Vomiting                                           | 1 (2.8%)             | 1              | .009 | 0 (0.0%)             | 0              | .000 | 2 (5.9%)             | 4              | .035 | N/A                 | N/A                 | 0.47 ( 0.04, 4.97)  |
| <b>General</b>                                     |                      |                |      |                      |                |      |                      |                |      |                     |                     |                     |
| Crying                                             | 0 (0.0%)             | 0              | .000 | 0 (0.0%)             | 0              | .000 | 1 (2.9%)             | 2              | .017 | N/A                 | N/A                 | N/A                 |
| Fatigue                                            | 2 (5.6%)             | 2              | .018 | 0 (0.0%)             | 0              | .000 | 4 (11.8%)            | 4              | .035 | N/A                 | N/A                 | 0.47 ( 0.09, 2.41)  |
| Gait disturbance                                   | 0 (0.0%)             | 0              | .000 | 1 (2.8%)             | 1              | .009 | 1 (2.9%)             | 1              | .009 | N/A                 | 0.94 ( 0.06, 14.51) | N/A                 |
| Influenza like illness                             | 1 (2.8%)             | 1              | .009 | 0 (0.0%)             | 0              | .000 | 0 (0.0%)             | 0              | .000 | N/A                 | N/A                 | N/A                 |
| Pyrexia                                            | 0 (0.0%)             | 0              | .000 | 1 (2.8%)             | 1              | .009 | 0 (0.0%)             | 0              | .000 | N/A                 | N/A                 | N/A                 |
| <b>Infections</b>                                  |                      |                |      |                      |                |      |                      |                |      |                     |                     |                     |
| Bronchitis                                         | 1 (2.8%)             | 1              | .009 | 0 (0.0%)             | 0              | .000 | 0 (0.0%)             | 0              | .000 | N/A                 | N/A                 | N/A                 |
| Conjunctivitis                                     | 0 (0.0%)             | 0              | .000 | 1 (2.8%)             | 1              | .009 | 0 (0.0%)             | 0              | .000 | N/A                 | N/A                 | N/A                 |
| Cystitis                                           | 0 (0.0%)             | 0              | .000 | 0 (0.0%)             | 0              | .000 | 1 (2.9%)             | 1              | .009 | N/A                 | N/A                 | N/A                 |
| Influenza                                          | 0 (0.0%)             | 0              | .000 | 2 (5.6%)             | 2              | .018 | 0 (0.0%)             | 0              | .000 | N/A                 | N/A                 | N/A                 |
| Nasopharyngitis                                    | 1 (2.8%)             | 1              | .009 | 0 (0.0%)             | 0              | .000 | 0 (0.0%)             | 0              | .000 | N/A                 | N/A                 | N/A                 |
| Pharyngitis                                        | 0 (0.0%)             | 0              | .000 | 1 (2.8%)             | 1              | .009 | 0 (0.0%)             | 0              | .000 | N/A                 | N/A                 | N/A                 |
| streptococcal                                      |                      |                |      |                      |                |      |                      |                |      |                     |                     |                     |
| Pyelonephritis                                     | 1 (2.8%)             | 1              | .009 | 0 (0.0%)             | 0              | .000 | 0 (0.0%)             | 0              | .000 | N/A                 | N/A                 | N/A                 |
| Sinusitis                                          | 0 (0.0%)             | 0              | .000 | 1 (2.8%)             | 1              | .009 | 1 (2.9%)             | 1              | .009 | N/A                 | 0.94 ( 0.06, 14.51) | N/A                 |
| Staphylococcal skin<br>infection                   | 0 (0.0%)             | 0              | .000 | 1 (2.8%)             | 1              | .009 | 0 (0.0%)             | 0              | .000 | N/A                 | N/A                 | N/A                 |
| Upper respiratory<br>tract infection               | 1 (2.8%)             | 1              | .009 | 3 (8.3%)             | 3              | .027 | 2 (5.9%)             | 2              | .017 | 0.33 ( 0.04, 3.06)  | 1.42 ( 0.25, 7.96)  | 0.47 ( 0.04, 4.97)  |
| Urinary tract infection                            | 2 (5.6%)             | 3              | .027 | 1 (2.8%)             | 2              | .018 | 0 (0.0%)             | 0              | .000 | 2.00 ( 0.19, 21.09) | N/A                 | N/A                 |
| <b>Injury, Poisoning, and<br/>Procedural Comp.</b> |                      |                |      |                      |                |      |                      |                |      |                     |                     |                     |
| Ankle fracture                                     | 1 (2.8%)             | 1              | .009 | 0 (0.0%)             | 0              | .000 | 0 (0.0%)             | 0              | .000 | N/A                 | N/A                 | N/A                 |
| Contusion                                          | 1 (2.8%)             | 1              | .009 | 0 (0.0%)             | 0              | .000 | 0 (0.0%)             | 0              | .000 | N/A                 | N/A                 | N/A                 |
| Fall                                               | 3 (8.3%)             | 3              | .027 | 1 (2.8%)             | 1              | .009 | 3 (8.8%)             | 6              | .052 | 3.00 ( 0.33, 27.50) | 0.31 ( 0.03, 2.88)  | 0.94 ( 0.20, 4.36)  |

|                                    |          |   |      |           |   |      |          |   |      |                     |                     |                     |
|------------------------------------|----------|---|------|-----------|---|------|----------|---|------|---------------------|---------------------|---------------------|
| Joint injury                       | 0 (0.0%) | 0 | .000 | 1 (2.8%)  | 1 | .009 | 0 (0.0%) | 0 | .000 | N/A                 | N/A                 | N/A                 |
| Ligament sprain                    | 0 (0.0%) | 0 | .000 | 1 (2.8%)  | 1 | .009 | 0 (0.0%) | 0 | .000 | N/A                 | N/A                 | N/A                 |
| Limb injury                        | 0 (0.0%) | 0 | .000 | 1 (2.8%)  | 1 | .009 | 0 (0.0%) | 0 | .000 | N/A                 | N/A                 | N/A                 |
| Muscle strain                      | 0 (0.0%) | 0 | .000 | 0 (0.0%)  | 0 | .000 | 1 (2.9%) | 1 | .009 | N/A                 | N/A                 | N/A                 |
| Post concussion syndrome           | 1 (2.8%) | 1 | .009 | 0 (0.0%)  | 0 | .000 | 0 (0.0%) | 0 | .000 | N/A                 | N/A                 | N/A                 |
| Tooth fracture                     | 0 (0.0%) | 0 | .000 | 1 (2.8%)  | 1 | .009 | 0 (0.0%) | 0 | .000 | N/A                 | N/A                 | N/A                 |
| <b>Investigations</b>              |          |   |      |           |   |      |          |   |      |                     |                     |                     |
| Alanine aminotransferase increased | 0 (0.0%) | 0 | .000 | 0 (0.0%)  | 0 | .000 | 2 (5.9%) | 2 | .017 | N/A                 | N/A                 | N/A                 |
| Blood bilirubin increased          | 1 (2.8%) | 1 | .009 | 0 (0.0%)  | 0 | .000 | 0 (0.0%) | 0 | .000 | N/A                 | N/A                 | N/A                 |
| Blood creatinine increased         | 1 (2.8%) | 1 | .009 | 2 (5.6%)  | 2 | .018 | 0 (0.0%) | 0 | .000 | 0.50 ( 0.05, 5.27)  | N/A                 | N/A                 |
| Electrocardiogram QT prolonged     | 0 (0.0%) | 0 | .000 | 1 (2.8%)  | 1 | .009 | 1 (2.9%) | 1 | .009 | N/A                 | 0.94 ( 0.06, 14.51) | N/A                 |
| Electrocardiogram T wave abnormal  | 1 (2.8%) | 1 | .009 | 0 (0.0%)  | 0 | .000 | 0 (0.0%) | 0 | .000 | N/A                 | N/A                 | N/A                 |
| Electrocardiogram abnormal         | 0 (0.0%) | 0 | .000 | 1 (2.8%)  | 1 | .009 | 0 (0.0%) | 0 | .000 | N/A                 | N/A                 | N/A                 |
| Eosinophil count increased         | 0 (0.0%) | 0 | .000 | 0 (0.0%)  | 0 | .000 | 1 (2.9%) | 1 | .009 | N/A                 | N/A                 | N/A                 |
| Glucose urine                      | 1 (2.8%) | 1 | .009 | 0 (0.0%)  | 0 | .000 | 0 (0.0%) | 0 | .000 | N/A                 | N/A                 | N/A                 |
| Glucose urine present              | 0 (0.0%) | 0 | .000 | 1 (2.8%)  | 1 | .009 | 0 (0.0%) | 0 | .000 | N/A                 | N/A                 | N/A                 |
| Hepatic enzyme increased           | 3 (8.3%) | 3 | .027 | 1 (2.8%)  | 1 | .009 | 1 (2.9%) | 1 | .009 | 3.00 ( 0.33, 27.50) | 0.94 ( 0.06, 14.51) | 2.83 ( 0.31, 25.94) |
| Platelet count decreased           | 0 (0.0%) | 0 | .000 | 1 (2.8%)  | 1 | .009 | 1 (2.9%) | 1 | .009 | N/A                 | 0.94 ( 0.06, 14.51) | N/A                 |
| Urine leukocyte esterase positive  | 0 (0.0%) | 0 | .000 | 0 (0.0%)  | 0 | .000 | 2 (5.9%) | 2 | .017 | N/A                 | N/A                 | N/A                 |
| Weight increased                   | 1 (2.8%) | 1 | .009 | 1 (2.8%)  | 1 | .009 | 1 (2.9%) | 1 | .009 | 1.00 ( 0.07, 15.38) | 0.94 ( 0.06, 14.51) | 0.94 ( 0.06, 14.51) |
| <b>Metabolic</b>                   |          |   |      |           |   |      |          |   |      |                     |                     |                     |
| Dehydration                        | 1 (2.8%) | 1 | .009 | 1 (2.8%)  | 1 | .009 | 0 (0.0%) | 0 | .000 | 1.00 ( 0.07, 15.38) | N/A                 | N/A                 |
| <b>Musculoskeletal</b>             |          |   |      |           |   |      |          |   |      |                     |                     |                     |
| Arthralgia                         | 1 (2.8%) | 1 | .009 | 1 (2.8%)  | 1 | .009 | 2 (5.9%) | 2 | .017 | 1.00 ( 0.07, 15.38) | 0.47 ( 0.04, 4.97)  | 0.47 ( 0.04, 4.97)  |
| Back pain                          | 0 (0.0%) | 0 | .000 | 0 (0.0%)  | 0 | .000 | 1 (2.9%) | 1 | .009 | N/A                 | N/A                 | N/A                 |
| Costochondritis                    | 1 (2.8%) | 1 | .009 | 0 (0.0%)  | 0 | .000 | 0 (0.0%) | 0 | .000 | N/A                 | N/A                 | N/A                 |
| Muscular weakness                  | 1 (2.8%) | 1 | .009 | 0 (0.0%)  | 0 | .000 | 0 (0.0%) | 0 | .000 | N/A                 | N/A                 | N/A                 |
| Musculoskeletal chest pain         | 1 (2.8%) | 1 | .009 | 0 (0.0%)  | 0 | .000 | 0 (0.0%) | 0 | .000 | N/A                 | N/A                 | N/A                 |
| Neck pain                          | 1 (2.8%) | 1 | .009 | 0 (0.0%)  | 0 | .000 | 0 (0.0%) | 0 | .000 | N/A                 | N/A                 | N/A                 |
| Osteoporosis                       | 0 (0.0%) | 0 | .000 | 0 (0.0%)  | 0 | .000 | 1 (2.9%) | 1 | .009 | N/A                 | N/A                 | N/A                 |
| Pain in extremity                  | 0 (0.0%) | 0 | .000 | 0 (0.0%)  | 0 | .000 | 2 (5.9%) | 2 | .017 | N/A                 | N/A                 | N/A                 |
| <b>Neoplasms</b>                   |          |   |      |           |   |      |          |   |      |                     |                     |                     |
| Renal neoplasm                     | 1 (2.8%) | 1 | .009 | 0 (0.0%)  | 0 | .000 | 0 (0.0%) | 0 | .000 | N/A                 | N/A                 | N/A                 |
| Squamous cell carcinoma            | 0 (0.0%) | 0 | .000 | 0 (0.0%)  | 0 | .000 | 1 (2.9%) | 1 | .009 | N/A                 | N/A                 | N/A                 |
| <b>Nervous System</b>              |          |   |      |           |   |      |          |   |      |                     |                     |                     |
| Anosmia                            | 1 (2.8%) | 1 | .009 | 0 (0.0%)  | 0 | .000 | 0 (0.0%) | 0 | .000 | N/A                 | N/A                 | N/A                 |
| Chorea                             | 0 (0.0%) | 0 | .000 | 1 (2.8%)  | 1 | .009 | 0 (0.0%) | 0 | .000 | N/A                 | N/A                 | N/A                 |
| Dizziness                          | 2 (5.6%) | 2 | .018 | 1 (2.8%)  | 1 | .009 | 1 (2.9%) | 1 | .009 | 2.00 ( 0.19, 21.09) | 0.94 ( 0.06, 14.51) | 1.89 ( 0.18, 19.89) |
| Dysarthria                         | 0 (0.0%) | 0 | .000 | 1 (2.8%)  | 1 | .009 | 0 (0.0%) | 0 | .000 | N/A                 | N/A                 | N/A                 |
| Headache                           | 3 (8.3%) | 3 | .027 | 1 (2.8%)  | 1 | .009 | 3 (8.8%) | 3 | .026 | 3.00 ( 0.33, 27.50) | 0.31 ( 0.03, 2.88)  | 0.94 ( 0.20, 4.36)  |
| Hypersomnia                        | 0 (0.0%) | 0 | .000 | 1 (2.8%)  | 1 | .009 | 0 (0.0%) | 0 | .000 | N/A                 | N/A                 | N/A                 |
| Lethargy                           | 1 (2.8%) | 1 | .009 | 0 (0.0%)  | 0 | .000 | 0 (0.0%) | 0 | .000 | N/A                 | N/A                 | N/A                 |
| Paraesthesia                       | 0 (0.0%) | 0 | .000 | 0 (0.0%)  | 0 | .000 | 1 (2.9%) | 1 | .009 | N/A                 | N/A                 | N/A                 |
| Somnolence                         | 0 (0.0%) | 0 | .000 | 4 (11.1%) | 4 | .035 | 1 (2.9%) | 1 | .009 | N/A                 | 3.78 ( 0.44, 32.13) | N/A                 |

|                             |                   |           |             |                   |           |             |                   |           |             |                           |                           |                           |     |
|-----------------------------|-------------------|-----------|-------------|-------------------|-----------|-------------|-------------------|-----------|-------------|---------------------------|---------------------------|---------------------------|-----|
| <b>Psychiatric</b>          |                   |           |             |                   |           |             |                   |           |             |                           |                           |                           |     |
| Abnormal dreams             | 0 (0.0%)          | 0         | .000        | 3 (8.3%)          | 3         | .027        | 0 (0.0%)          | 0         | .000        | N/A                       | N/A                       | N/A                       | N/A |
| Aggression                  | 0 (0.0%)          | 0         | .000        | 1 (2.8%)          | 1         | .009        | 1 (2.9%)          | 1         | .009        | N/A                       | 0.94 ( 0.06, 14.51)       | N/A                       | N/A |
| Agitation                   | 1 (2.8%)          | 1         | .009        | 0 (0.0%)          | 0         | .000        | 0 (0.0%)          | 0         | .000        | N/A                       | N/A                       | N/A                       | N/A |
| Anxiety                     | 1 (2.8%)          | 1         | .009        | 0 (0.0%)          | 0         | .000        | 0 (0.0%)          | 0         | .000        | N/A                       | N/A                       | N/A                       | N/A |
| Apathy                      | 0 (0.0%)          | 0         | .000        | 0 (0.0%)          | 0         | .000        | 1 (2.9%)          | 1         | .009        | N/A                       | N/A                       | N/A                       | N/A |
| Depressed mood              | 2 (5.6%)          | 2         | .018        | 0 (0.0%)          | 0         | .000        | 1 (2.9%)          | 1         | .009        | N/A                       | N/A                       | 1.89 ( 0.18, 19.89)       | N/A |
| Hallucination,<br>auditory  | 0 (0.0%)          | 0         | .000        | 1 (2.8%)          | 1         | .009        | 0 (0.0%)          | 0         | .000        | N/A                       | N/A                       | N/A                       | N/A |
| Hypervigilance              | 1 (2.8%)          | 1         | .009        | 0 (0.0%)          | 0         | .000        | 0 (0.0%)          | 0         | .000        | N/A                       | N/A                       | N/A                       | N/A |
| Indifference                | 0 (0.0%)          | 0         | .000        | 0 (0.0%)          | 0         | .000        | 1 (2.9%)          | 1         | .009        | N/A                       | N/A                       | N/A                       | N/A |
| Insomnia                    | 2 (5.6%)          | 2         | .018        | 0 (0.0%)          | 0         | .000        | 1 (2.9%)          | 1         | .009        | N/A                       | N/A                       | 1.89 ( 0.18, 19.89)       | N/A |
| Intentional self-injury     | 1 (2.8%)          | 1         | .009        | 0 (0.0%)          | 0         | .000        | 0 (0.0%)          | 0         | .000        | N/A                       | N/A                       | N/A                       | N/A |
| Irritability                | 1 (2.8%)          | 1         | .009        | 1 (2.8%)          | 1         | .009        | 1 (2.9%)          | 1         | .009        | 1.00 ( 0.07, 15.38)       | 0.94 ( 0.06, 14.51)       | 0.94 ( 0.06, 14.51)       | N/A |
| Psychotic disorder          | 1 (2.8%)          | 1         | .009        | 0 (0.0%)          | 0         | .000        | 0 (0.0%)          | 0         | .000        | N/A                       | N/A                       | N/A                       | N/A |
| Sleep disorder              | 0 (0.0%)          | 0         | .000        | 0 (0.0%)          | 0         | .000        | 1 (2.9%)          | 1         | .009        | N/A                       | N/A                       | N/A                       | N/A |
| Suicidal ideation           | 1 (2.8%)          | 1         | .009        | 0 (0.0%)          | 0         | .000        | 1 (2.9%)          | 1         | .009        | N/A                       | N/A                       | 0.94 ( 0.06, 14.51)       | N/A |
| Suicide attempt             | 0 (0.0%)          | 0         | .000        | 0 (0.0%)          | 0         | .000        | 1 (2.9%)          | 1         | .009        | N/A                       | N/A                       | N/A                       | N/A |
| <b>Renal</b>                |                   |           |             |                   |           |             |                   |           |             |                           |                           |                           |     |
| Dysuria                     | 0 (0.0%)          | 0         | .000        | 0 (0.0%)          | 0         | .000        | 1 (2.9%)          | 1         | .009        | N/A                       | N/A                       | N/A                       | N/A |
| Proteinuria                 | 1 (2.8%)          | 1         | .009        | 1 (2.8%)          | 1         | .009        | 0 (0.0%)          | 0         | .000        | 1.00 ( 0.07, 15.38)       | N/A                       | N/A                       | N/A |
| Renal cyst                  | 1 (2.8%)          | 1         | .009        | 0 (0.0%)          | 0         | .000        | 0 (0.0%)          | 0         | .000        | N/A                       | N/A                       | N/A                       | N/A |
| Urinary hesitation          | 0 (0.0%)          | 0         | .000        | 0 (0.0%)          | 0         | .000        | 1 (2.9%)          | 1         | .009        | N/A                       | N/A                       | N/A                       | N/A |
| <b>Reproductive</b>         |                   |           |             |                   |           |             |                   |           |             |                           |                           |                           |     |
| Dysmenorrhoea               | 1 (2.8%)          | 1         | .009        | 0 (0.0%)          | 0         | .000        | 0 (0.0%)          | 0         | .000        | N/A                       | N/A                       | N/A                       | N/A |
| <b>Respiratory</b>          |                   |           |             |                   |           |             |                   |           |             |                           |                           |                           |     |
| Asthma                      | 0 (0.0%)          | 0         | .000        | 0 (0.0%)          | 0         | .000        | 1 (2.9%)          | 1         | .009        | N/A                       | N/A                       | N/A                       | N/A |
| Cough                       | 2 (5.6%)          | 2         | .018        | 1 (2.8%)          | 1         | .009        | 0 (0.0%)          | 0         | .000        | 2.00 ( 0.19, 21.09)       | N/A                       | N/A                       | N/A |
| Dry throat                  | 1 (2.8%)          | 1         | .009        | 0 (0.0%)          | 0         | .000        | 0 (0.0%)          | 0         | .000        | N/A                       | N/A                       | N/A                       | N/A |
| Dyspnoea                    | 0 (0.0%)          | 0         | .000        | 0 (0.0%)          | 0         | .000        | 1 (2.9%)          | 1         | .009        | N/A                       | N/A                       | N/A                       | N/A |
| Nasal congestion            | 1 (2.8%)          | 1         | .009        | 0 (0.0%)          | 0         | .000        | 0 (0.0%)          | 0         | .000        | N/A                       | N/A                       | N/A                       | N/A |
| Oropharyngeal pain          | 0 (0.0%)          | 0         | .000        | 0 (0.0%)          | 0         | .000        | 1 (2.9%)          | 1         | .009        | N/A                       | N/A                       | N/A                       | N/A |
| Rhinitis allergic           | 1 (2.8%)          | 1         | .009        | 0 (0.0%)          | 0         | .000        | 0 (0.0%)          | 0         | .000        | N/A                       | N/A                       | N/A                       | N/A |
| Sleep apnoea<br>syndrome    | 0 (0.0%)          | 0         | .000        | 0 (0.0%)          | 0         | .000        | 1 (2.9%)          | 1         | .009        | N/A                       | N/A                       | N/A                       | N/A |
| <b>Skin</b>                 |                   |           |             |                   |           |             |                   |           |             |                           |                           |                           |     |
| Dermatitis acneiform        | 1 (2.8%)          | 1         | .009        | 0 (0.0%)          | 0         | .000        | 0 (0.0%)          | 0         | .000        | N/A                       | N/A                       | N/A                       | N/A |
| Hyperhidrosis               | 1 (2.8%)          | 1         | .009        | 0 (0.0%)          | 0         | .000        | 0 (0.0%)          | 0         | .000        | N/A                       | N/A                       | N/A                       | N/A |
| Night sweats                | 0 (0.0%)          | 0         | .000        | 1 (2.8%)          | 1         | .009        | 0 (0.0%)          | 0         | .000        | N/A                       | N/A                       | N/A                       | N/A |
| Precancerous skin<br>lesion | 0 (0.0%)          | 0         | .000        | 0 (0.0%)          | 0         | .000        | 1 (2.9%)          | 1         | .009        | N/A                       | N/A                       | N/A                       | N/A |
| <b>Vascular</b>             |                   |           |             |                   |           |             |                   |           |             |                           |                           |                           |     |
| Hot flush                   | 0 (0.0%)          | 0         | .000        | 0 (0.0%)          | 0         | .000        | 1 (2.9%)          | 1         | .009        | N/A                       | N/A                       | N/A                       | N/A |
| Hypertension                | 0 (0.0%)          | 0         | .000        | 0 (0.0%)          | 0         | .000        | 1 (2.9%)          | 1         | .009        | N/A                       | N/A                       | N/A                       | N/A |
| Hypotension                 | 1 (2.8%)          | 1         | .009        | 0 (0.0%)          | 0         | .000        | 0 (0.0%)          | 0         | .000        | N/A                       | N/A                       | N/A                       | N/A |
| <b>Total</b>                | <b>29 (80.6%)</b> | <b>75</b> | <b>.676</b> | <b>26 (72.2%)</b> | <b>52</b> | <b>.460</b> | <b>30 (88.2%)</b> | <b>73</b> | <b>.635</b> | <b>1.12 ( 0.86, 1.44)</b> | <b>0.82 ( 0.65, 1.04)</b> | <b>0.91 ( 0.75, 1.12)</b> |     |

Column Definitions:

1: System Organ Class of AE; bold terms are the System Organ Class of AE

2,5,8: Number and percentage of subjects who have ever had AE

3,6,9: Total number of AEs; includes multiple AEs of same type per subject

4,7,10: Number of AEs per 30 days

11: Relative Risk (120 mg relative to Placebo) and 95% confidence interval

12: Relative Risk (Placebo relative to 160 mg) and 95% confidence interval

13: Relative Risk (120 mg relative to 160 mg) and 95% confidence interval

**Supplementary Figure S1.** The power analysis is shown for the placebo single-arm sample size ( $n_p$ ) as a function of the difference of the group completer proportions ( $\pi_p - \pi_T$ ) and the marginal placebo proportion ( $\pi_p$ ). Paneling is by  $\alpha$ -level, with 80% power. In the left-hand panel, the upper red line shows that conducting two tests each at  $\alpha = .025$  and 80% power requires approximately 36 participants per group for the smallest proposed control proportion ( $\pi_p = .80$ ) and the largest proportion difference ( $\pi_p - \pi_T = .20$ ). Therefore, the projected total sample size of  $N = 3n_p =$  was 108, and a sample size of  $2n_p = 72$  for each comparison (120mg vs placebo, 160mg vs placebo). The right panel shows the n's for conducting two tests at  $\alpha = .05$ .

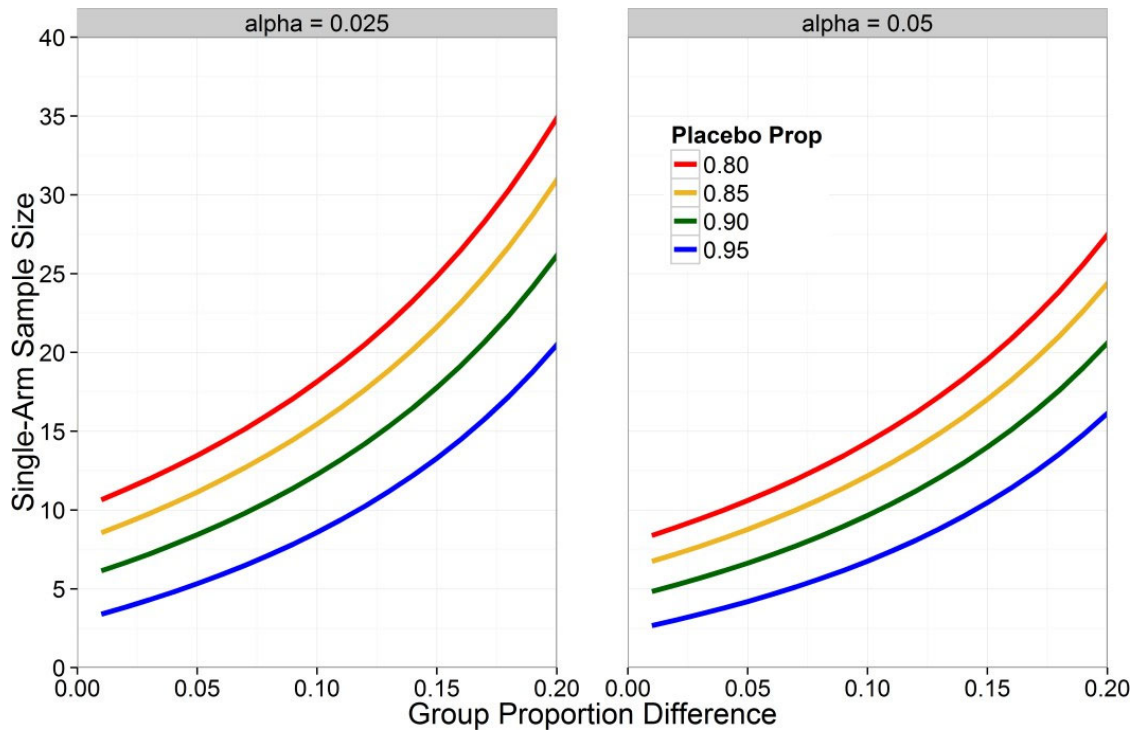

Supplement: jcm-09-03682-s001.pdf [file jcm-09-03682-s001.pdf]
